# Supplementary material for: Somatic HLA Class I Loss Is a Widespread Mechanism of Immune Evasion Which Refines the Use of Tumor Mutational Burden as a Biomarker of Checkpoint Inhibitor Response
Source: Oxford University Press journal article supplement (doi:10.1158/2159-8290.cd-20-0672), 2020-10-30
Supplement: 21598290cd200672-sup-243330_2_supp_6676974_qstb8l.pdf [file 21598290cd200672-sup-243330_2_supp_6676974_qstb8l.pdf]

**Supplementary Data Figure S5. Effects of hybridization on HLA baiting efficiency.**

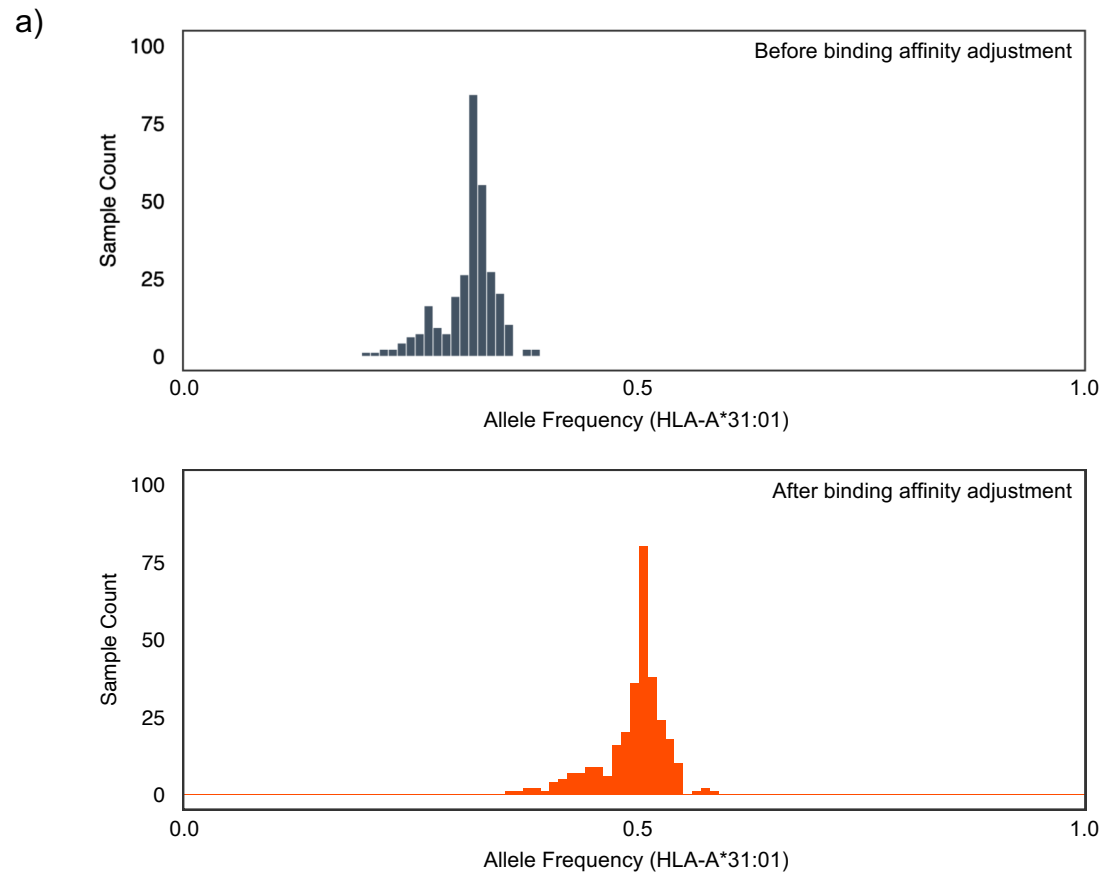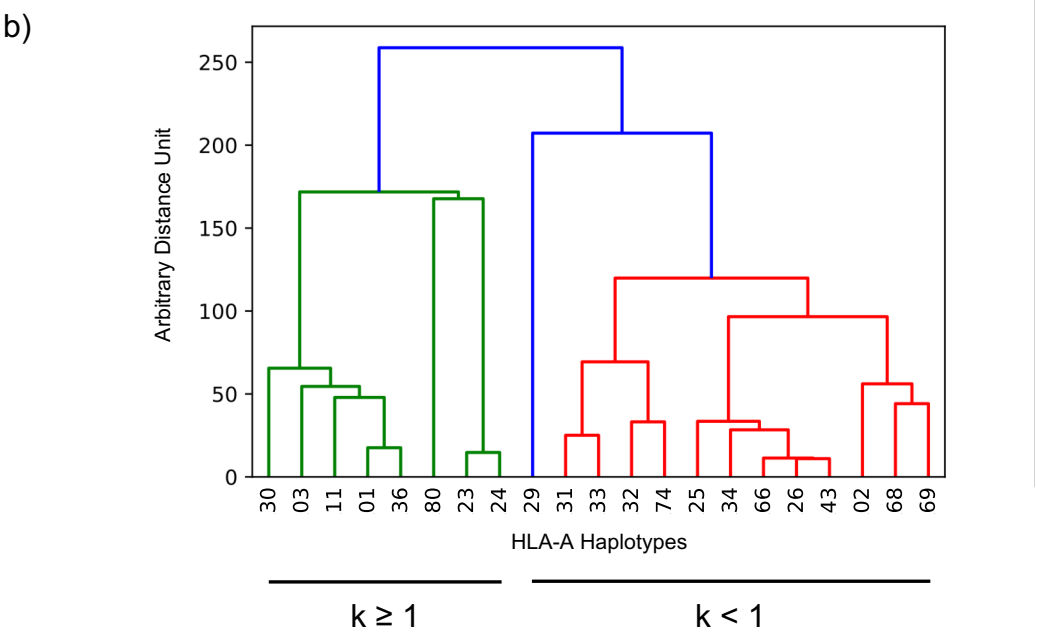

**Supplementary Data Figure S5. Effects of hybridization on HLA baiting efficiency.** a) Example of how hybrid-capture can pull down HLA target sequences with different efficiency. Allele frequency (AF) of the HLA-A\*31:01 allele before (top, median AF = 0.3) and after (bottom, median AF = 0.5) adjusting for hybrid-capture binding affinity bias in samples with HLA-A\*31:01 and HLA-A\*11:01 alleles. b) Dendrogram of representative sequences for each known two-digit haplotype of HLA-A. A matrix of all pairwise sequence distances was used to cluster the haplotypes. The  $k$  affinity constants for haplotypes on the left were all greater than or equal to 1 while the  $k$  constant for sequences on the right were all less than 1.
